# Supplementary material for: Accuracy assessment of global internal tide models using satellite altimetry
Source: Copernicus journal article supplement (doi:10.5194/os-2020-57), 2020-06-23
Supplement: Supplementary file 1 [file os-2020-57-supplement.pdf]

# Accuracy assessment of global internal tide models using satellite altimetry

Loren Carrere<sup>1</sup>, Brian K. Arbic<sup>2</sup>, Brian Dushaw<sup>3</sup>, Gary Egbert<sup>4</sup>, Svetlana Erofeeva<sup>4</sup>, Florent Lyard<sup>5</sup>,  
Richard D. Ray<sup>6</sup>, Clément Ubelmann<sup>7</sup>, Edward Zaron<sup>8</sup>, Zhongxiang Zhao<sup>9</sup>, Jay F. Shriver<sup>10</sup>, Maarten  
5 Cornelis Buijsman<sup>11</sup>, Nicolas Picot<sup>12</sup>

<sup>1</sup>CLS, Ramonville-Saint-Agne, 31450, France

<sup>2</sup>University of Michigan, Ann Arbor, MI, USA

<sup>3</sup>no affiliation, Girona, 17004, Spain

10 <sup>4</sup>Department Geology and Geophysics, Oregon State University, Corvallis, OR 97331-5503, USA

<sup>5</sup>LEGOS-OMP laboratory, Toulouse, 31401, France

<sup>6</sup>NASA Goddard Space Flight Center, Greenbelt, MD 20771, USA

<sup>7</sup>Ocean Next, La Terrasse, 38660, France

<sup>8</sup>Department of Civil and Environmental Engineering, Portland State University, Portland, OR 97207-0751, USA

15 <sup>9</sup>Applied Physics Laboratory, University of Washington, Seattle, WA, USA

<sup>10</sup>Naval Research Laboratory, Stennis Space Center, MS, USA

<sup>11</sup>Division of Marine Science, University of Southern Mississippi, Stennis Space Center, MS 39529, USA

<sup>12</sup>CNES, Toulouse, 31400, France

20 *Correspondence to:* L. Carrere ([lcarrere@groupcls.com](mailto:lcarrere@groupcls.com))

## Supplementary materials

The plots of the amplitude of the M2 internal tide on the IT regions defined in Figure 1 are provided below.

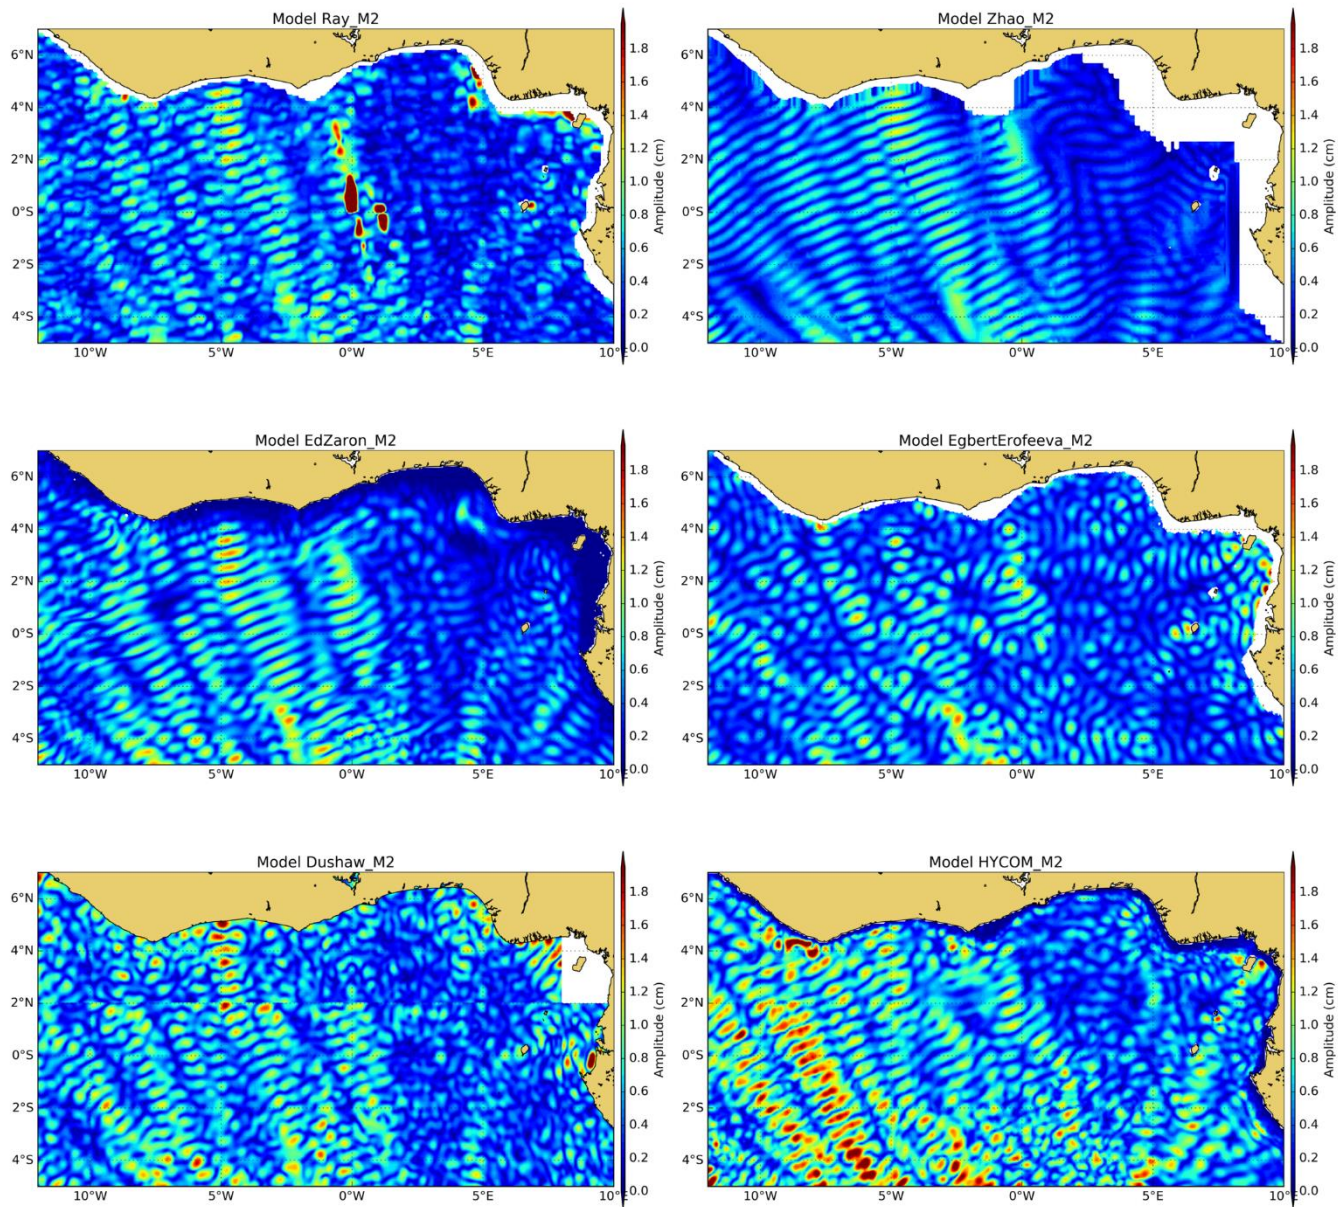

25

**Figure S1: amplitude of the IT models for M2 tide component on Gulf Of Guinea region**

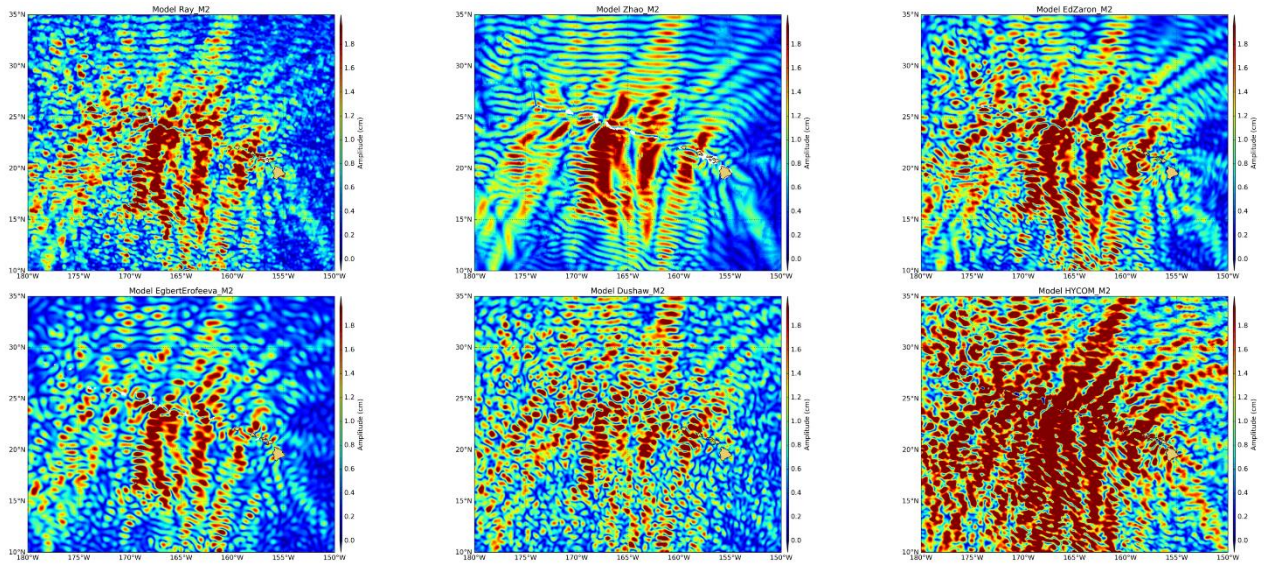

**Figure S2: amplitude of the IT models for M2 tide component on Hawaii region**



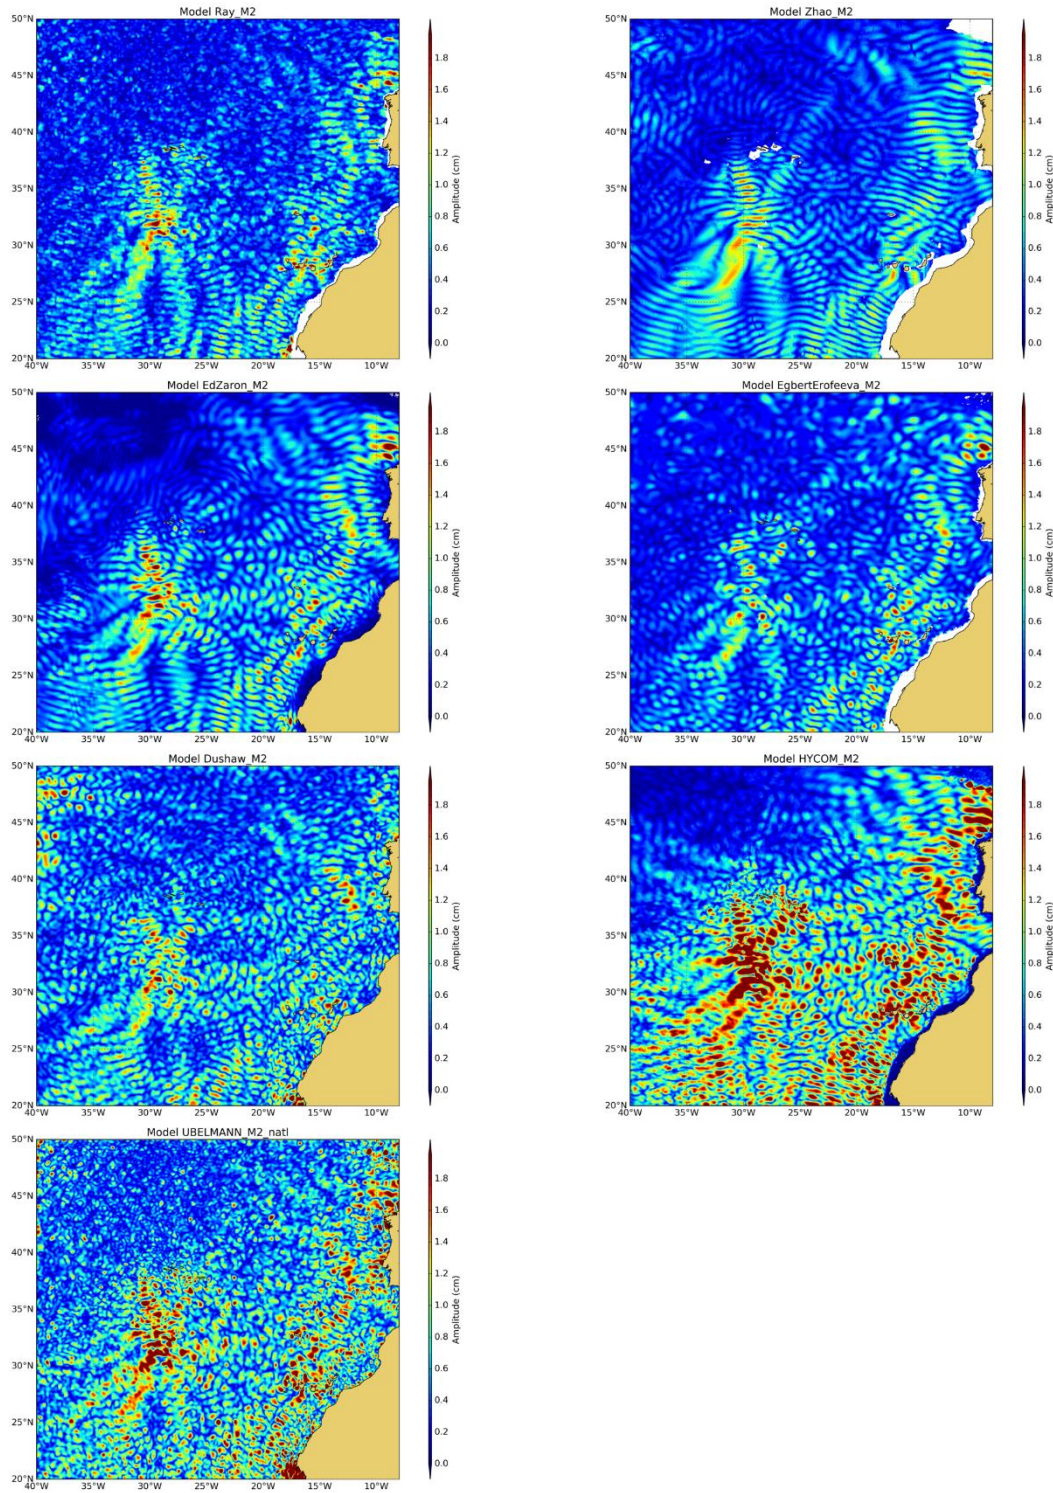

Figure S3: amplitude of the IT models for M2 tide component on NPAC region



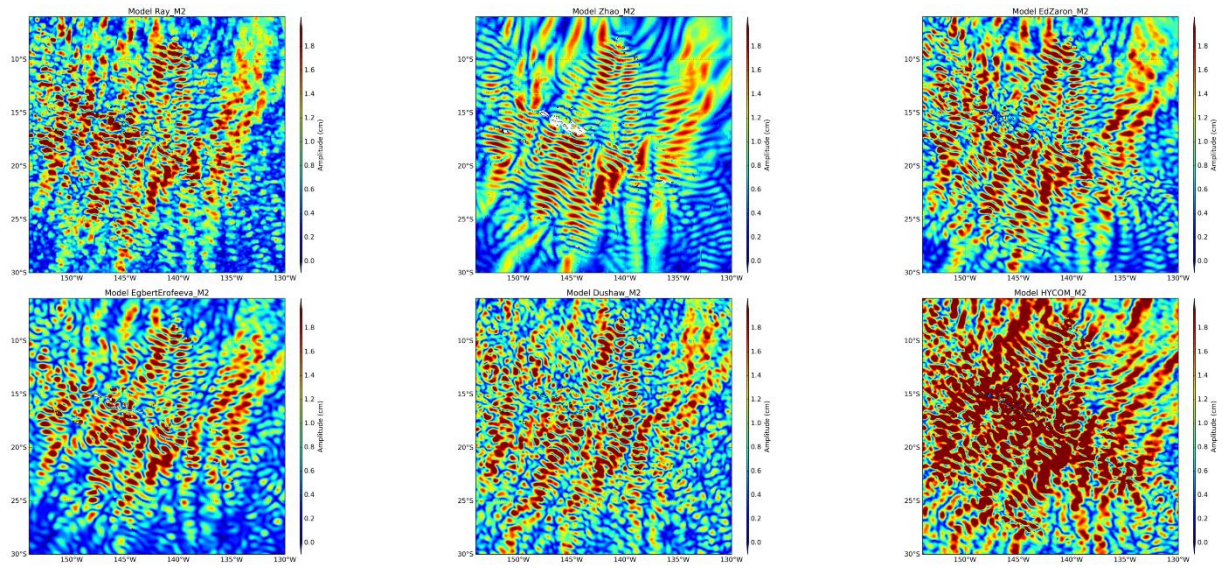

**Figure S4: amplitude of the IT models for M2 tide component on Tahiti region**

35

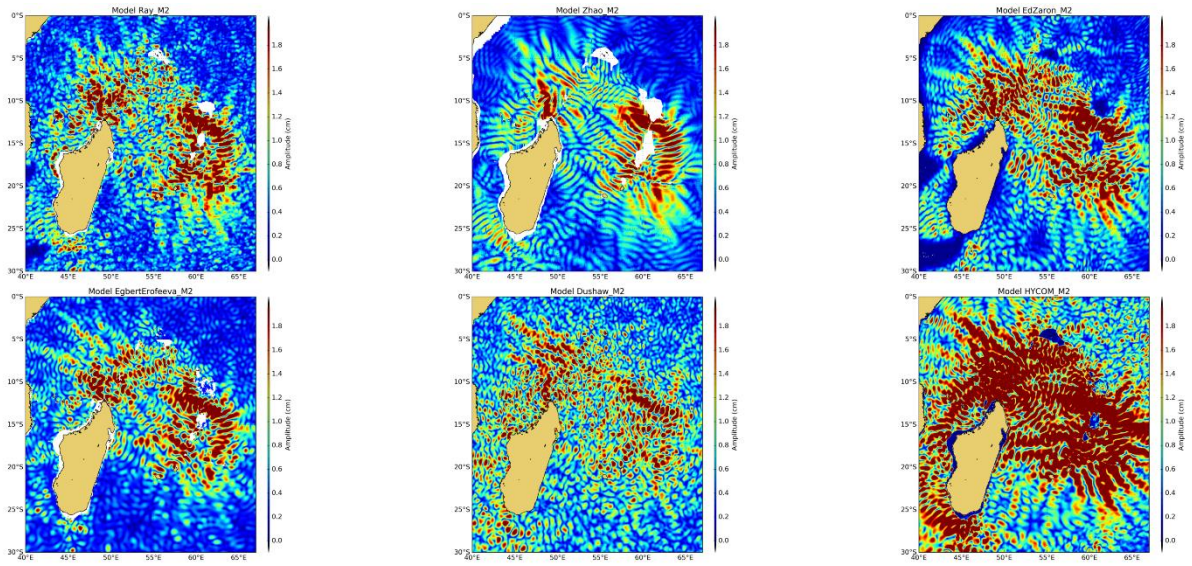

**Figure S5: amplitude of the IT models for M2 tide component on Madagascar region**
